# Supplementary material for: BRG1 promotes progression of B-cell acute lymphoblastic leukemia by disrupting PPP2R1A transcription
Source: PubMed Central journal article supplement (PMC11347705; doi:10.1038/s41419-024-06996-w), 2024-08-26

Supplementary Figure 1

A

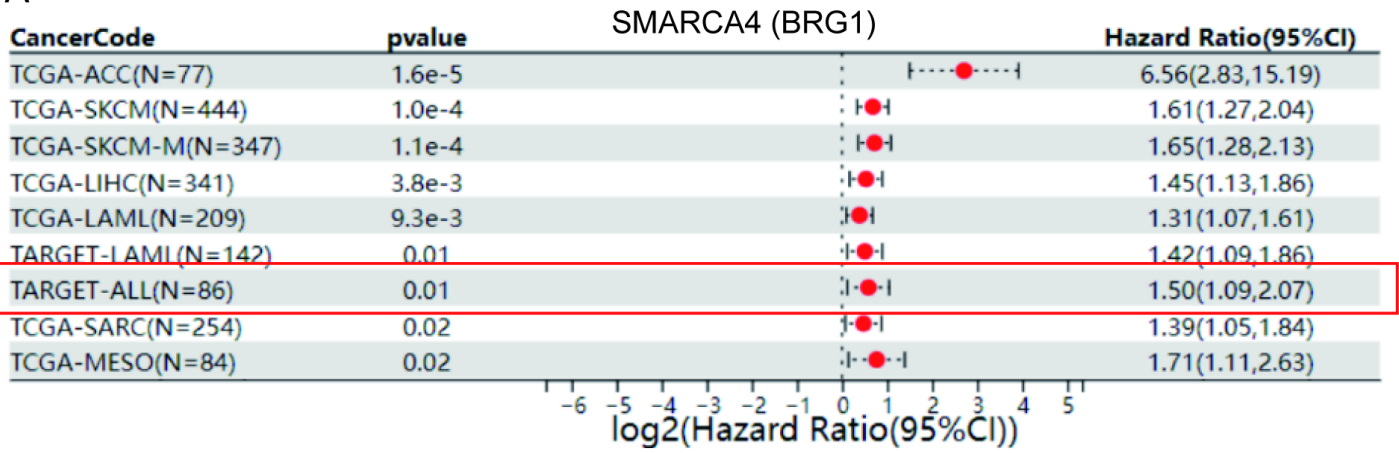

B

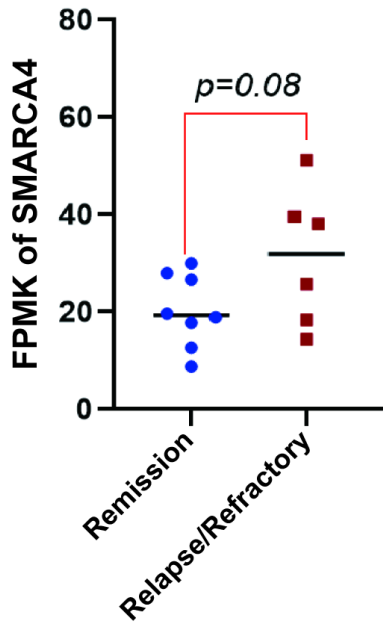

C

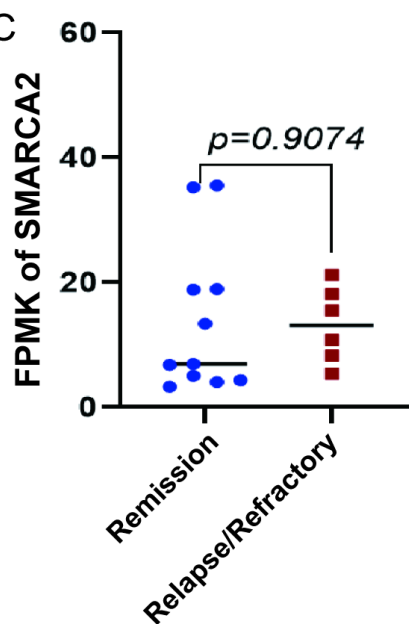

D

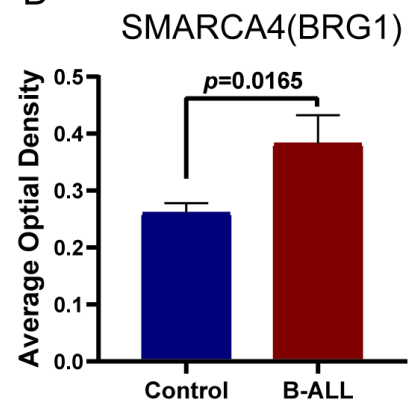

Supplementary Figure 2

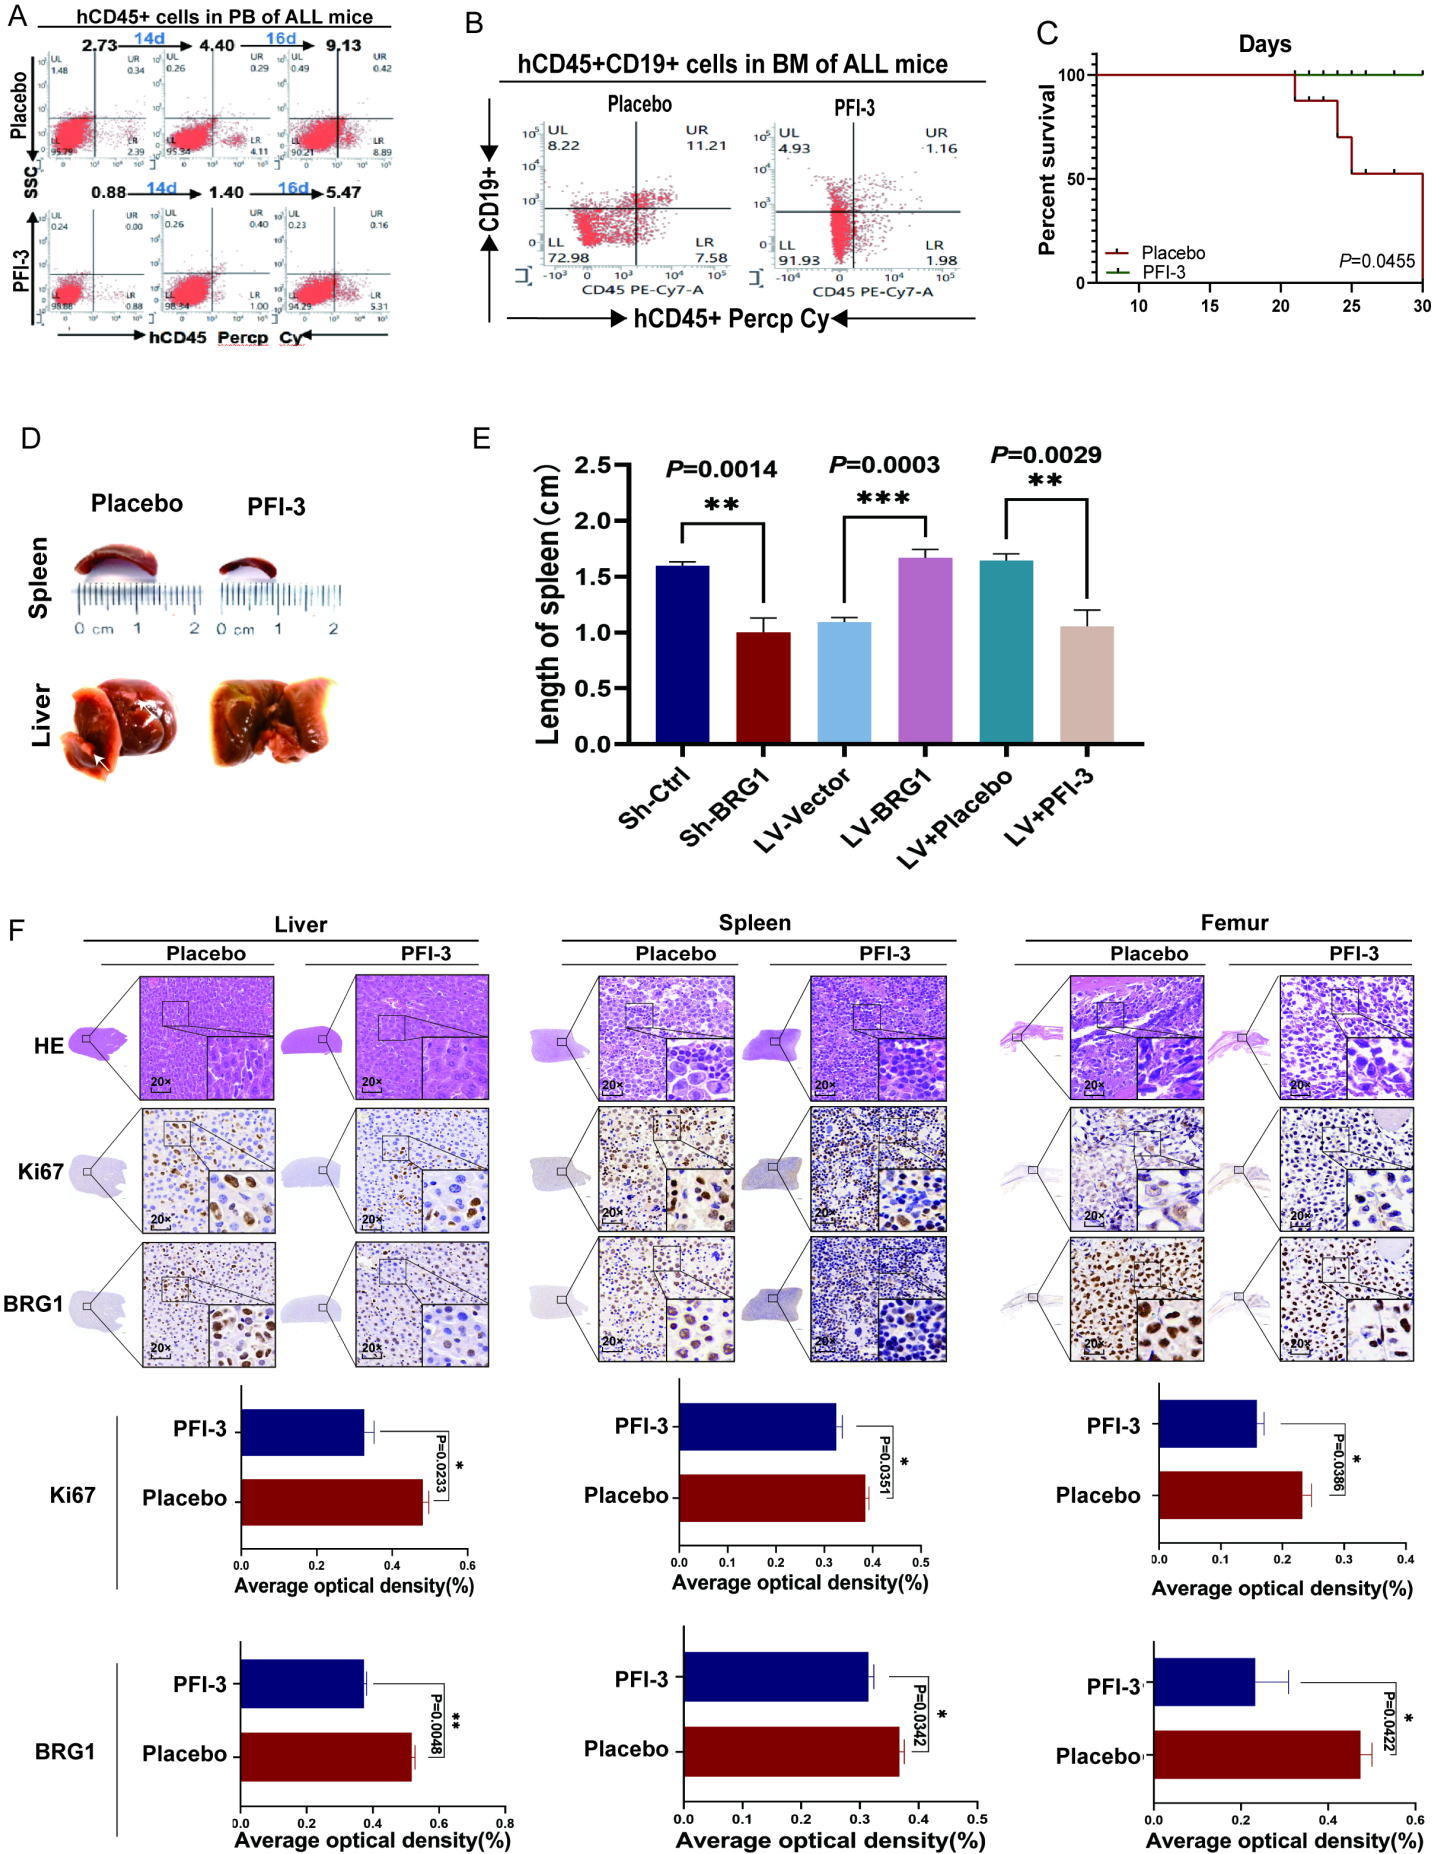

# Supplementary Figure 3

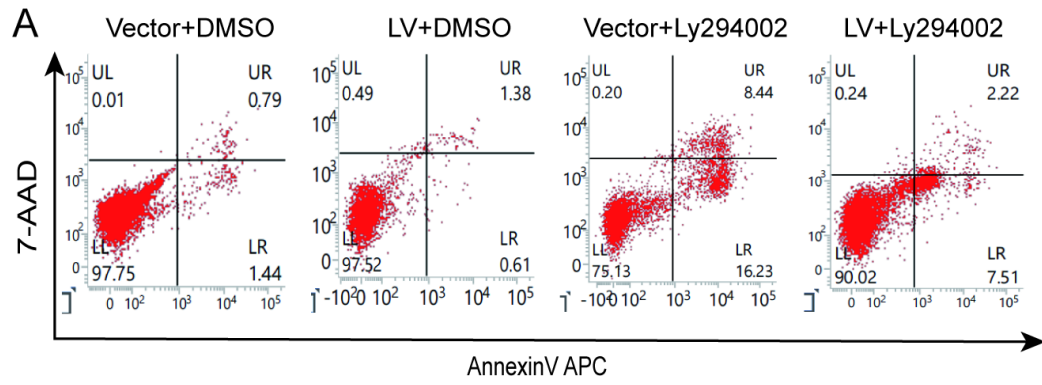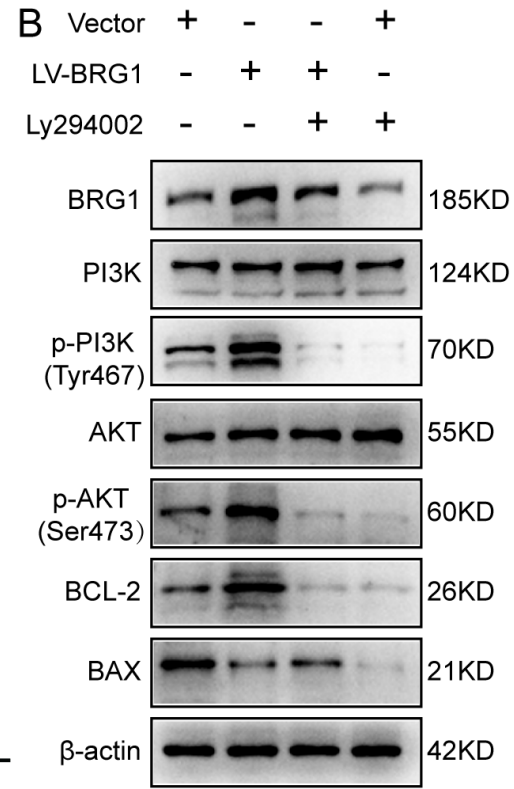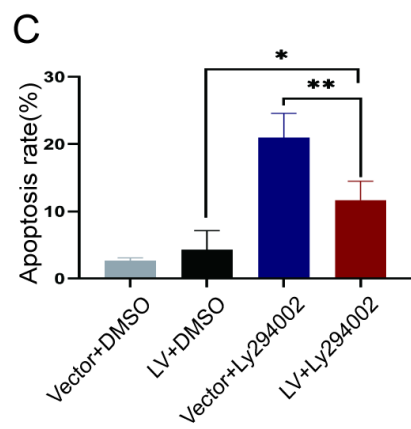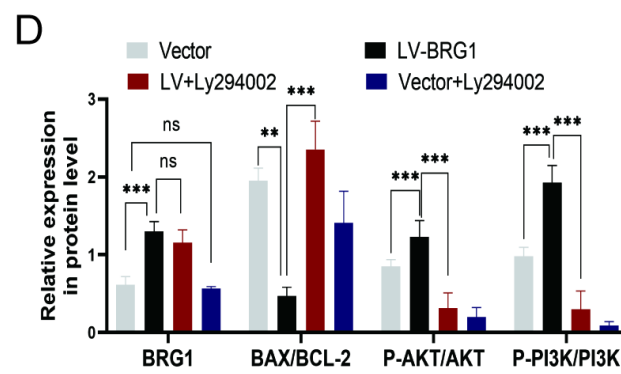

# Supplementary Figure 4

**A**

| Sample         | ALL_1_IP | ALL_2_IP | ALL_1_Input | ALL_2_Input |
|----------------|----------|----------|-------------|-------------|
| Raw_reads      | 60388450 | 58725318 | 46113258    | 54555812    |
| Raw_bases(G)   | 9.06     | 8.81     | 6.92        | 8.18        |
| Clean_reads    | 59847902 | 58230760 | 41563746    | 51926934    |
| Clean_bases(G) | 8.85     | 8.57     | 6.18        | 7.66        |
| Clean_ratio    | 97.72%   | 97.32%   | 89.33%      | 93.61%      |
| GC_content     | 41.83%   | 41.83%   | 47.99%      | 43.77%      |
| Raw_Q20        | 98.07%   | 98.01%   | 95.45%      | 97.18%      |
| Raw_Q30        | 94.31%   | 94.09%   | 89.65%      | 92.9%       |
| Clean_Q20      | 98.38%   | 98.33%   | 97.75%      | 98.42%      |
| Clean_Q30      | 94.87%   | 94.68%   | 93.51%      | 95.05%      |

**B**

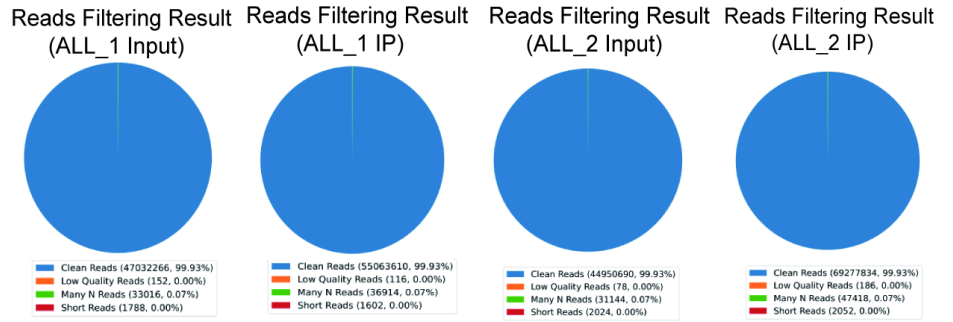

**C**

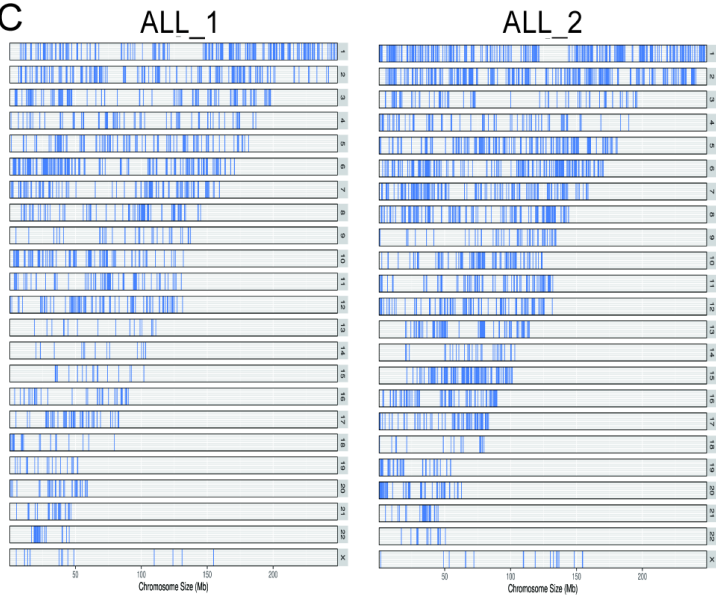

**D**

| IP       | Input/Mock  | Fragment_length | Count_of_summits | Count_of_narrow_peak |
|----------|-------------|-----------------|------------------|----------------------|
| ALL_1_IP | ALL_1_Input | 183             | 4675             | 3522                 |
| ALL_2_IP | ALL_2_Input | 174             | 4580             | 3956                 |

**F**

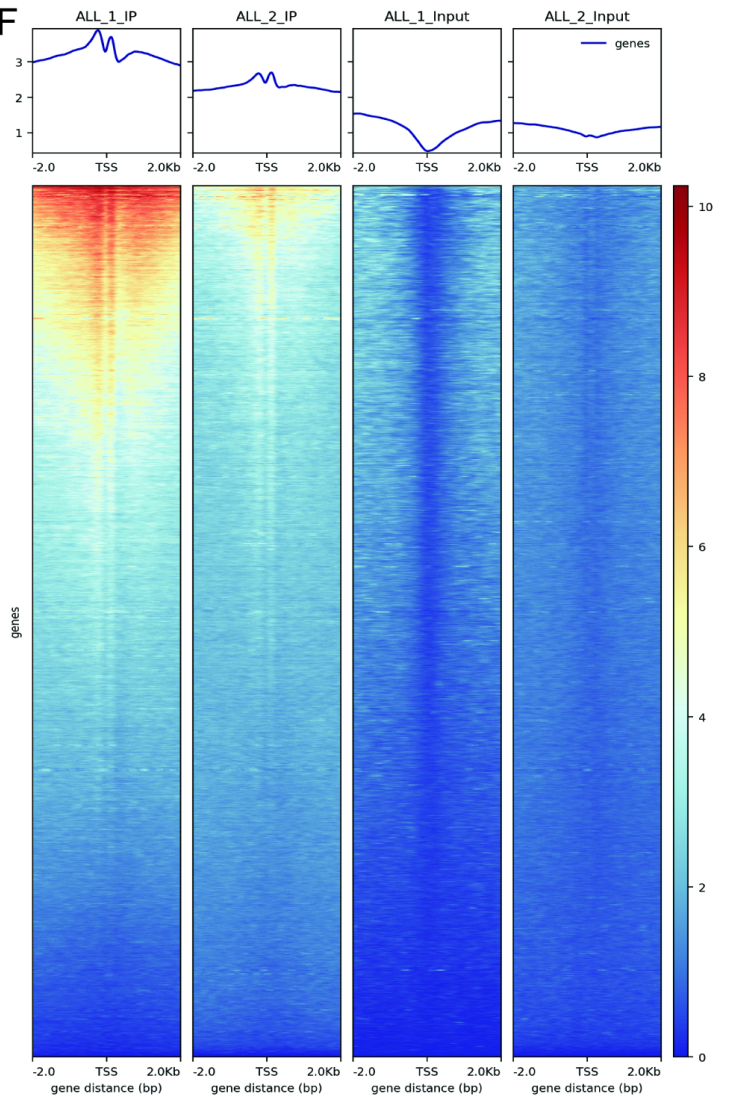

**E**

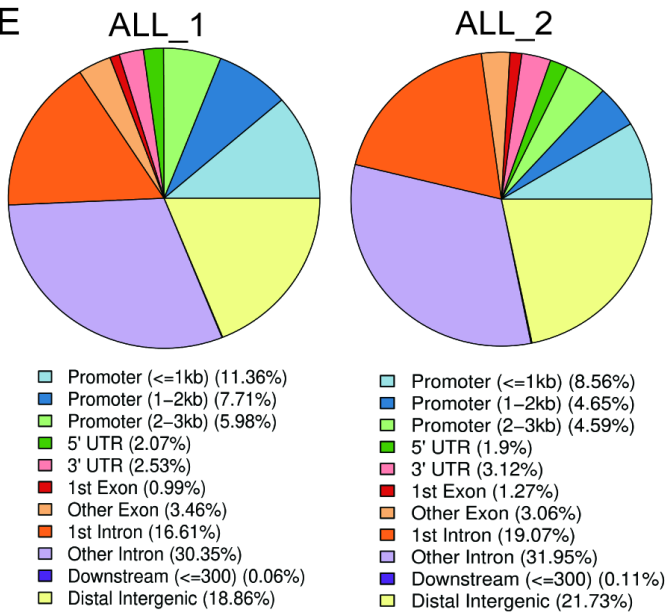

## Supplementary Figure 5

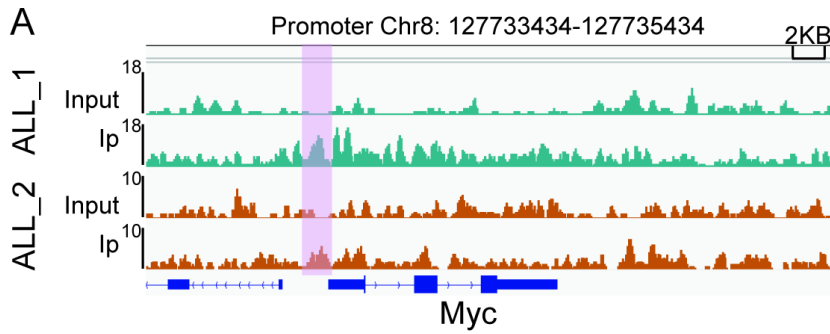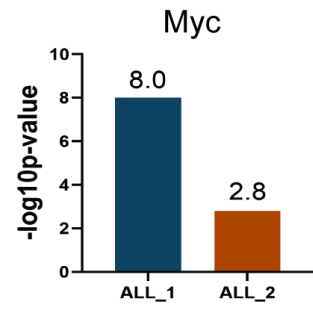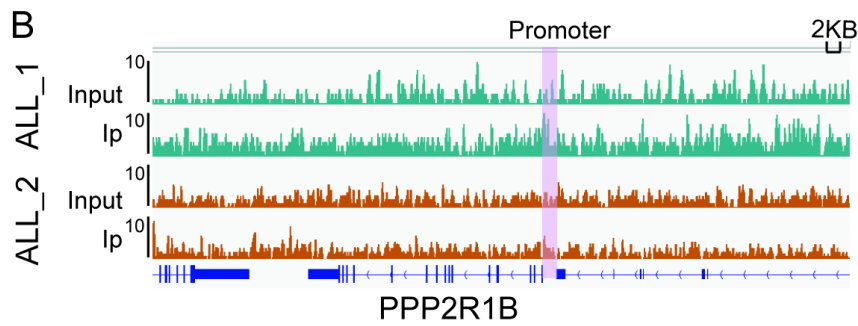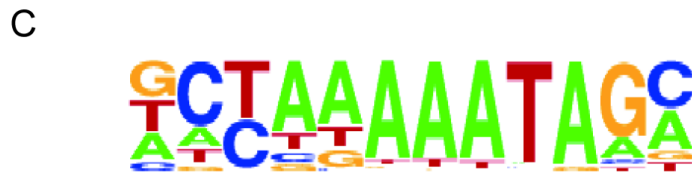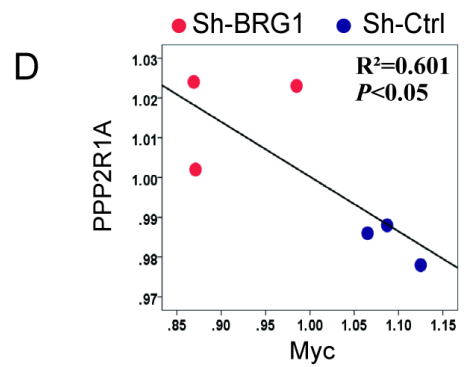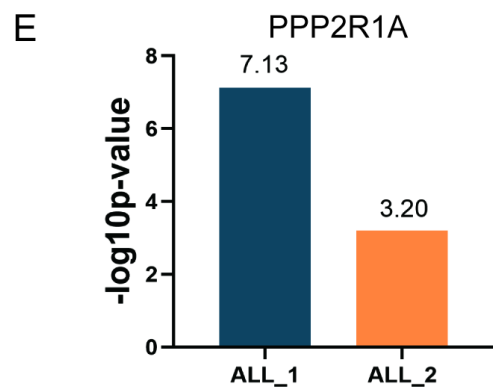

Supplement: 41419_2024_6996_MOESM3_ESM.pdf [file 41419_2024_6996_MOESM3_ESM.pdf]
