# Supplementary material for: BRG1 promotes progression of B-cell acute lymphoblastic leukemia by disrupting PPP2R1A transcription
Source: PubMed Central journal article supplement (PMC11347705; doi:10.1038/s41419-024-06996-w), 2024-08-26

# Original western blots

SourceDataF1F

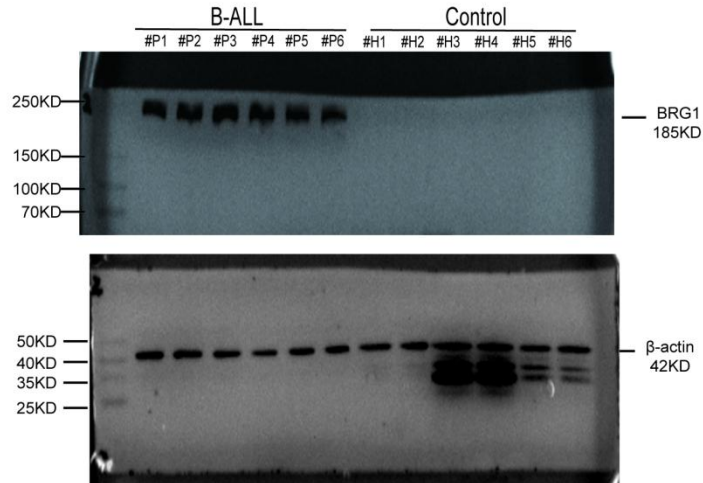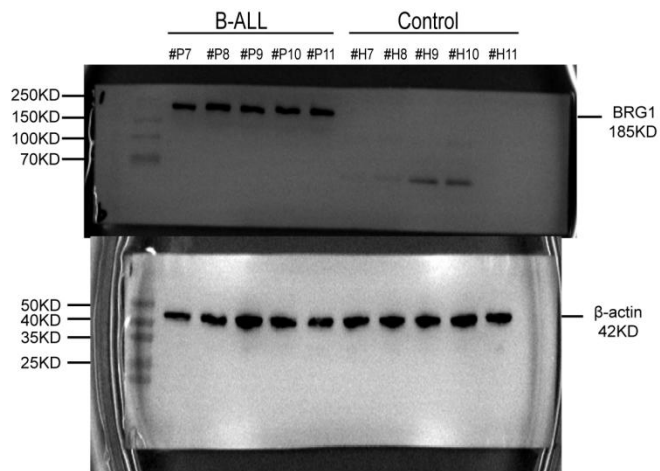

### SourceDataF2A

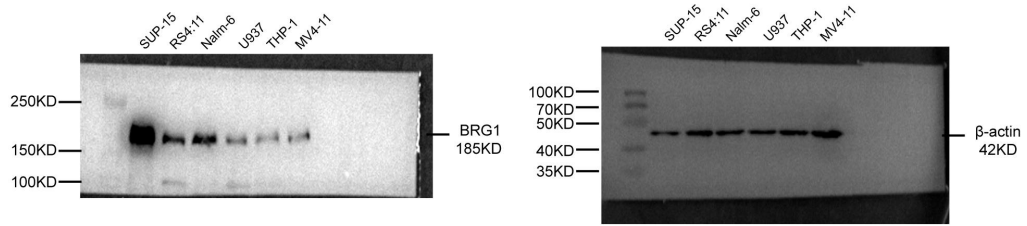

### SourceDataF2B

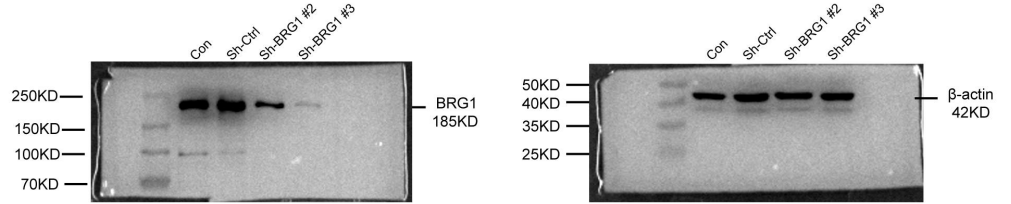

### SourceDataF2C

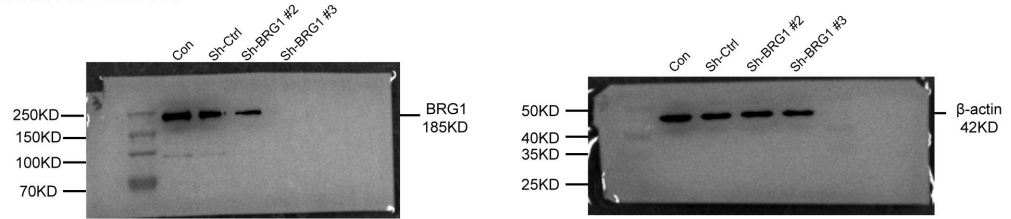

### SourceDataF2D

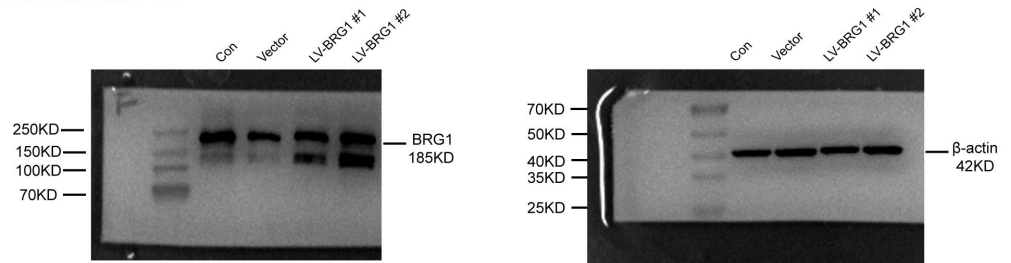

SourceDataF3F

SUP-B15

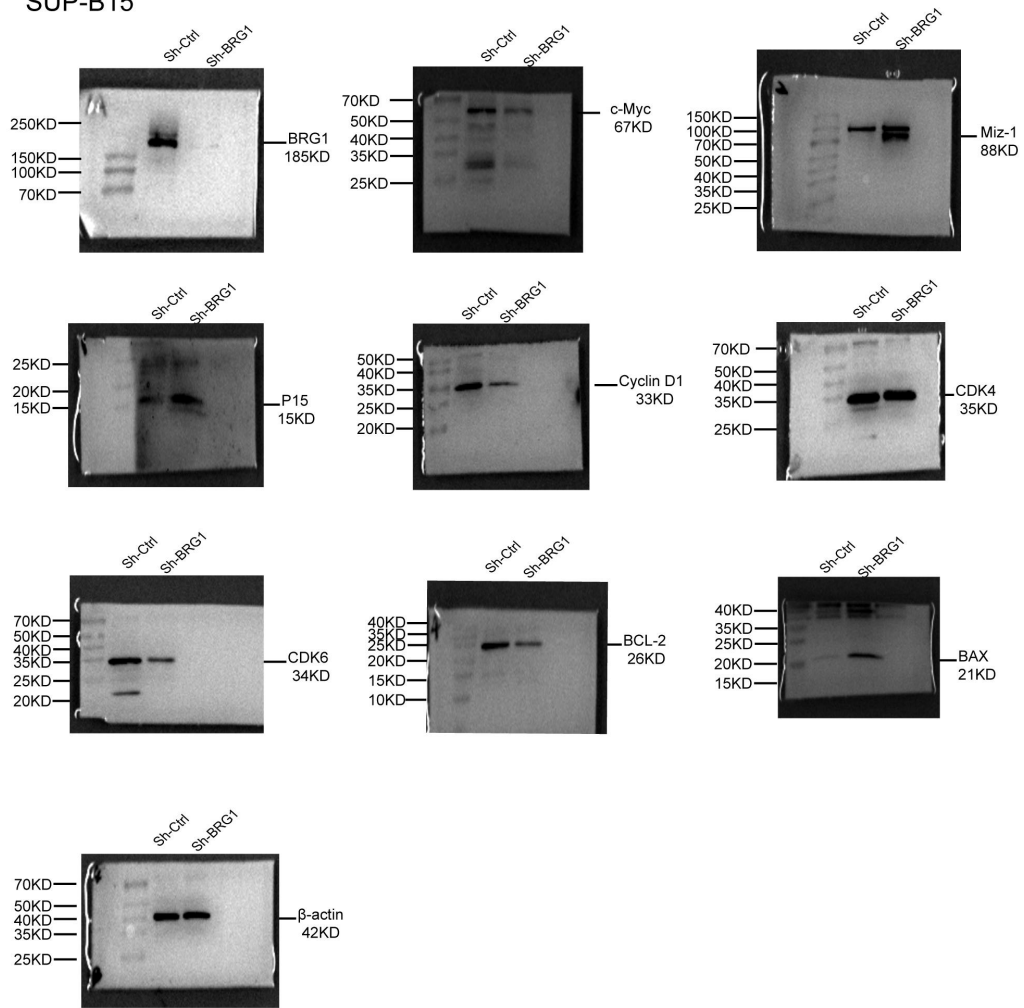

SourceDataF3F

Nalm-6

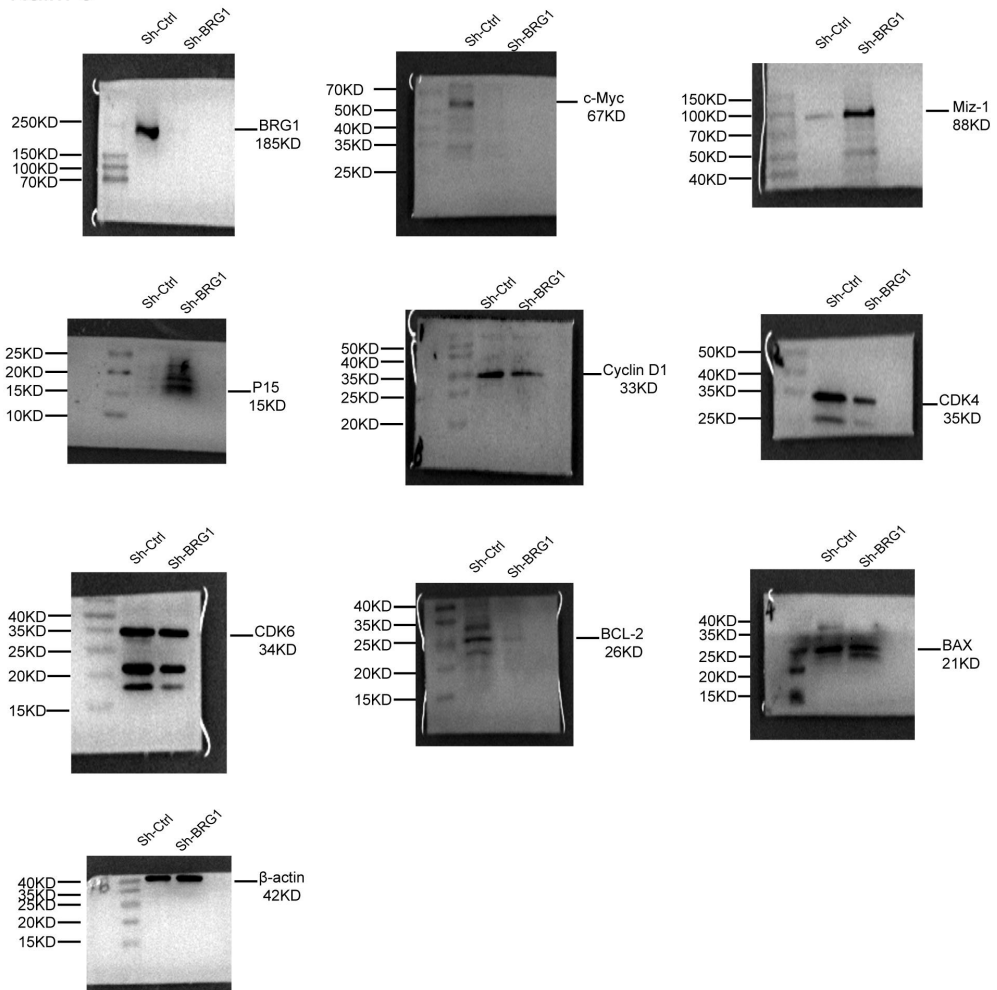

SourceDataF3F

RS 4:11

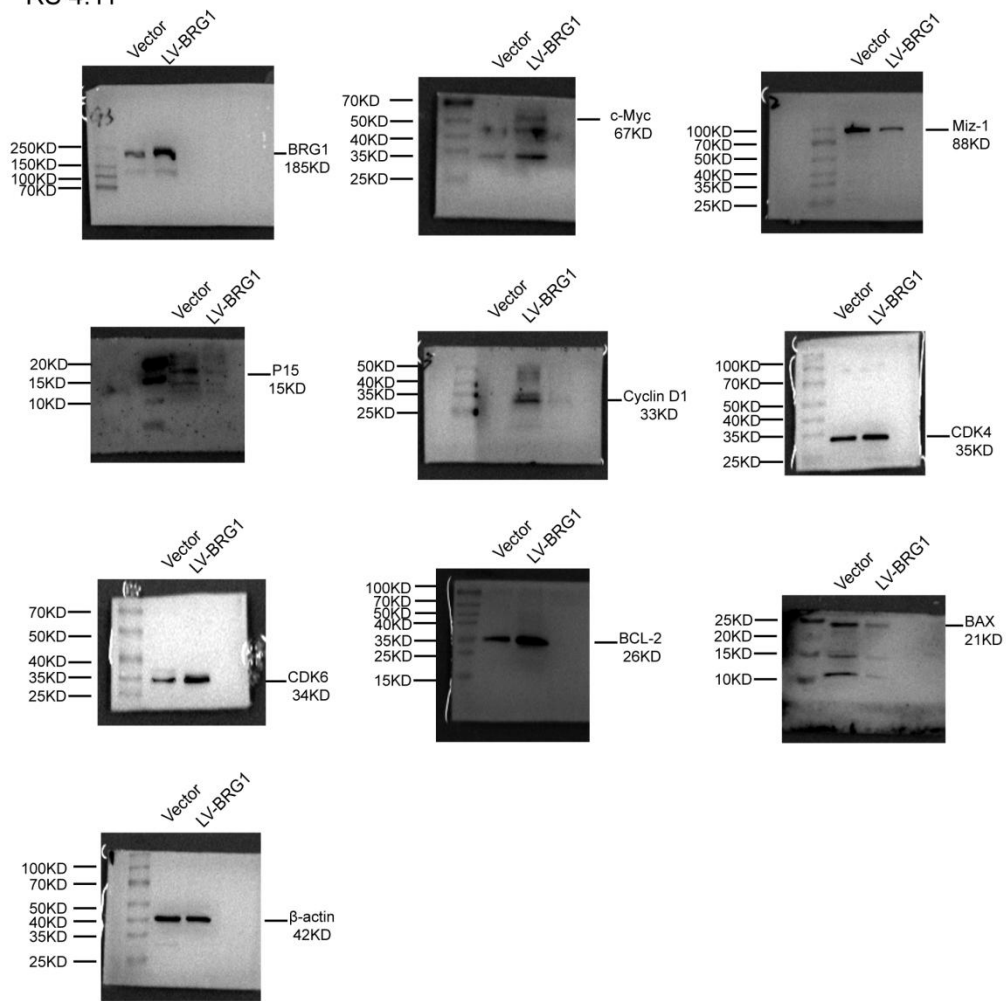

## SourceDataF5C

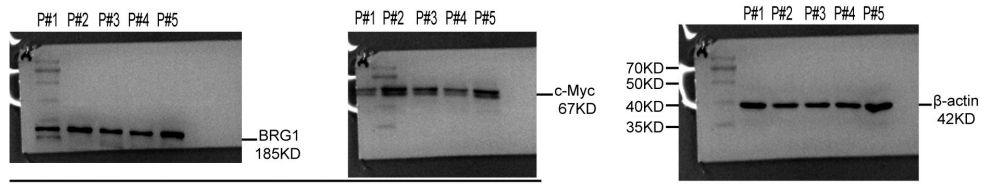

Note: Shifting of images and markers due to inadvertent handling during image acquisition.

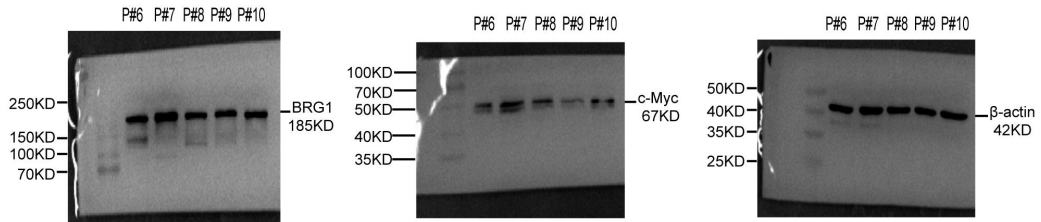

## SourceDataF5E

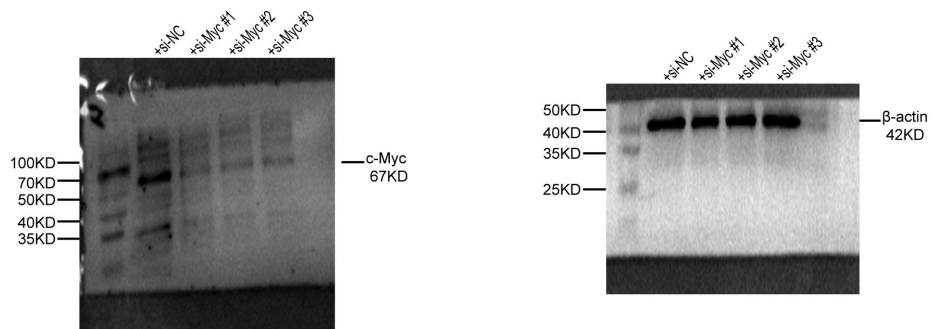

SourceDataF5K

|         |   |   |   |   |
|---------|---|---|---|---|
| Vector  | + | - | - | + |
| LV-BRG1 | - | + | + | - |
| si-Myc  | - | - | + | + |

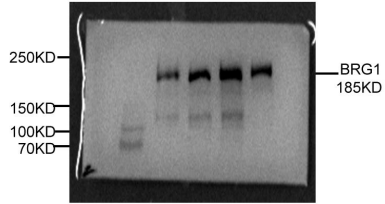

|         |   |   |   |   |
|---------|---|---|---|---|
| Vector  | + | - | - | + |
| LV-BRG1 | - | + | + | - |
| si-Myc  | - | - | + | + |

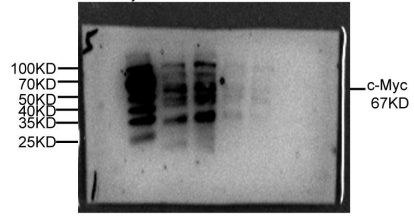

|         |   |   |   |   |
|---------|---|---|---|---|
| Vector  | + | - | - | + |
| LV-BRG1 | - | + | + | - |
| si-Myc  | - | - | + | + |

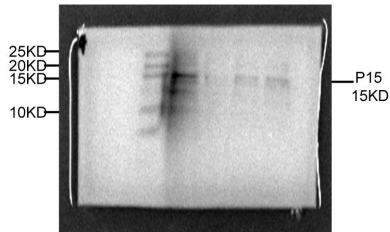

|         |   |   |   |   |
|---------|---|---|---|---|
| Vector  | + | - | - | + |
| LV-BRG1 | - | + | + | - |
| si-Myc  | - | - | + | + |

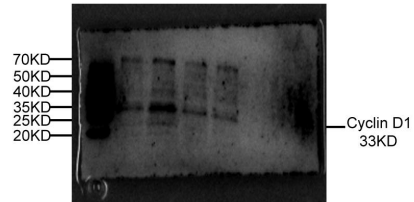

|         |   |   |   |   |
|---------|---|---|---|---|
| Vector  | + | - | - | + |
| LV-BRG1 | - | + | + | - |
| si-Myc  | - | - | + | + |

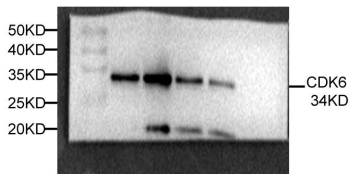

|         |   |   |   |   |
|---------|---|---|---|---|
| Vector  | + | - | - | + |
| LV-BRG1 | - | + | + | - |
| si-Myc  | - | - | + | + |

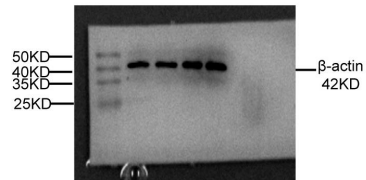

SourceDaraF6E-1

SUP-B15

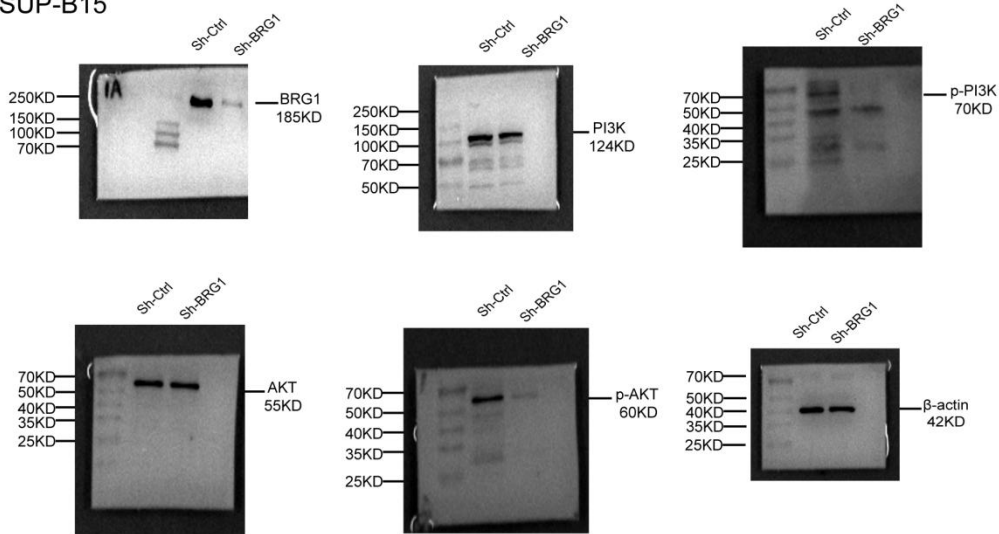

Nalm-6

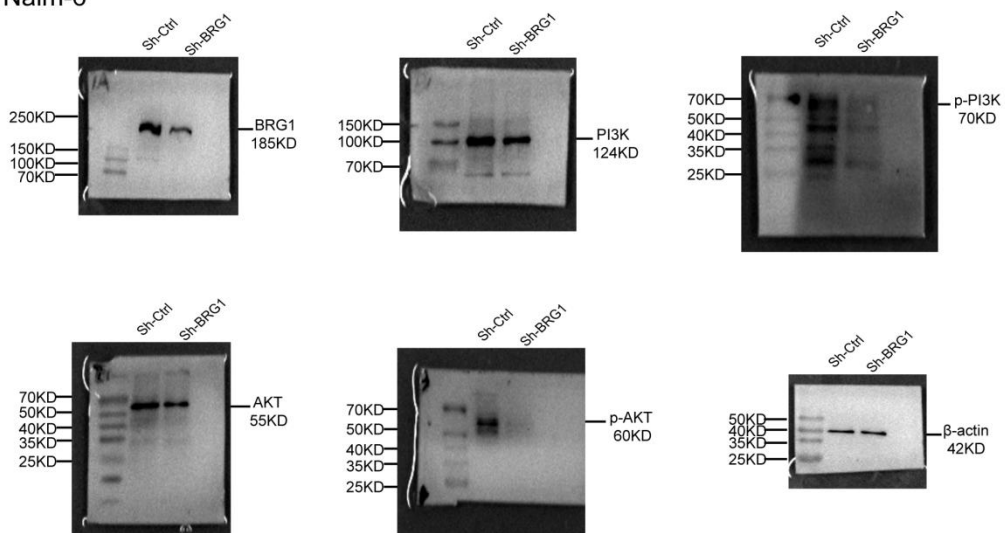



SourceDaraF6E-2

RS 4:11

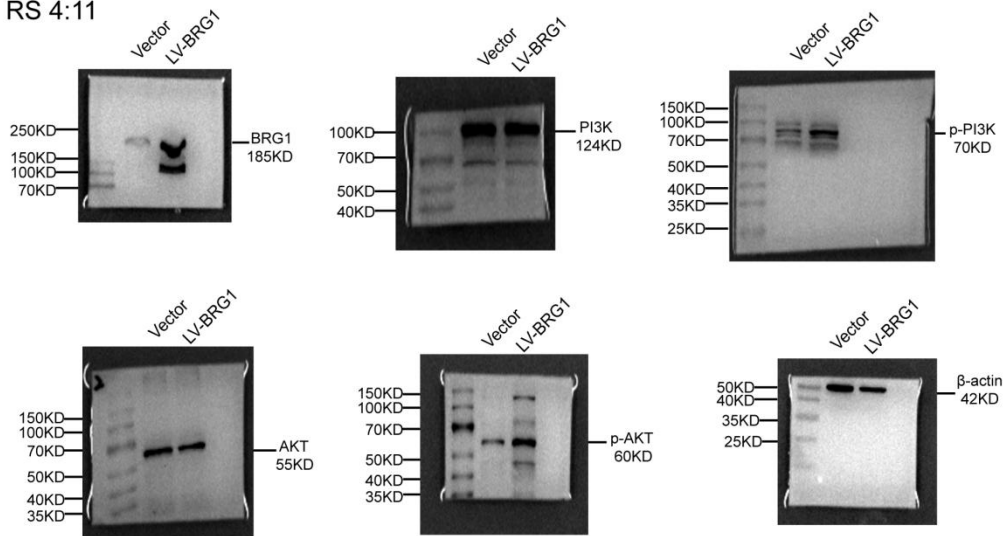

SourceDataF7F

SUP-B15

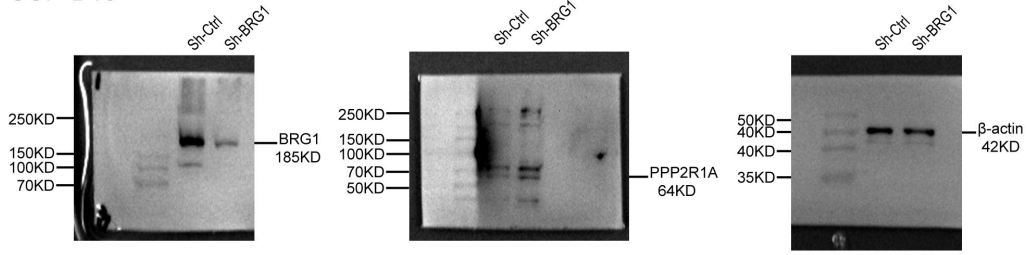

Nalm-6

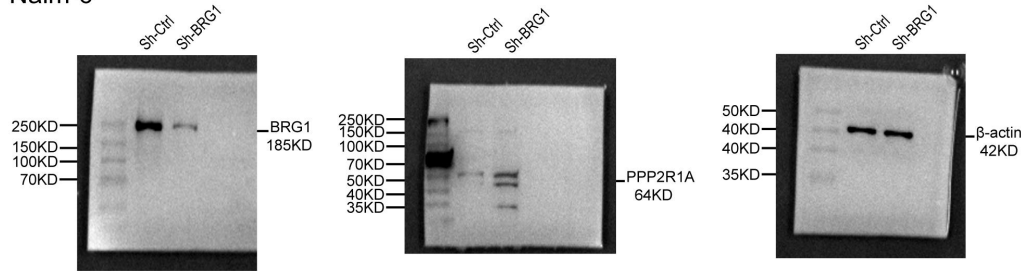

RS4:11

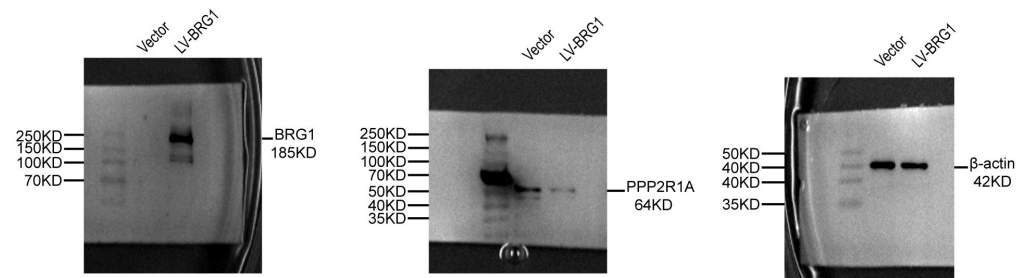

# SourceData SupplementalF3B

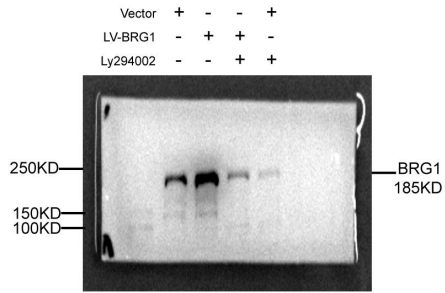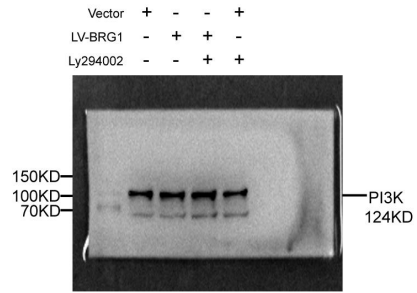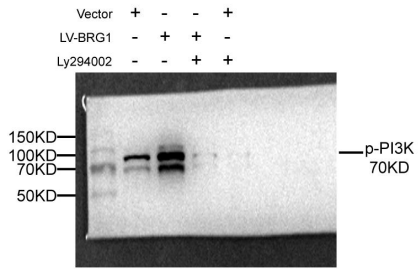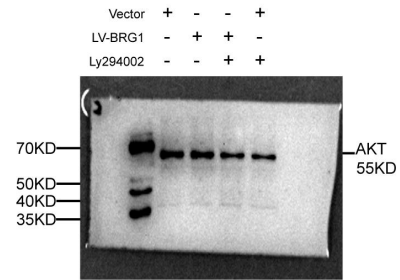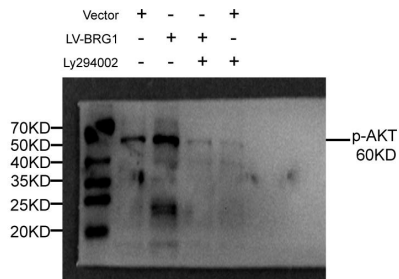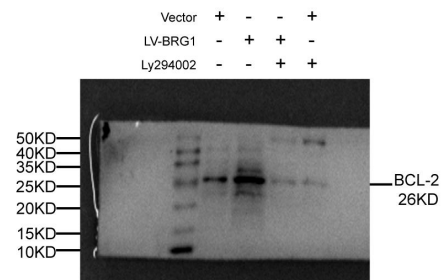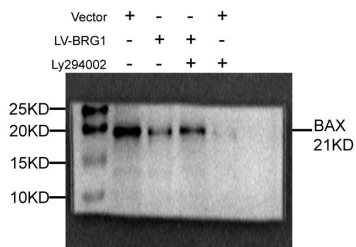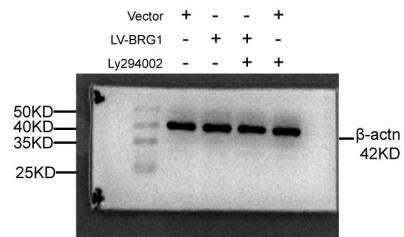

Supplement: 41419_2024_6996_MOESM7_ESM.pdf [file 41419_2024_6996_MOESM7_ESM.pdf]
